# Supplementary material
Source: Springer Nature journal article supplement (https://www.springermedizin.de/resource/supplementary/12919_2009_2838_MOESM1_ESM.pdf/9653760)
Supplement: MOESM1 [file 9653760]

**Supplemental File 1 - The 39 significant joint-test results for HDL-C significant at a 1% FDR**

| Gene            | Illumina      |            | Association            | Expression             | Multi-Z                |
|-----------------|---------------|------------|------------------------|------------------------|------------------------|
|                 | transcript ID | Chromosome | <i>p</i> -value        | <i>p</i> -value        | <i>p</i> -value        |
| <i>CETP</i>     | GI_4557442-S  | 16         | $<1.0 \times 10^{-20}$ | $2.4 \times 10^{-1}$   | $<1.0 \times 10^{-20}$ |
| <i>SMURF1</i>   | GI_31317289-A | 7          | $<1.0 \times 10^{-20}$ | $7.1 \times 10^{-1}$   | $<1.0 \times 10^{-20}$ |
| <i>KLHL6</i>    | GI_18482382-S | 3          | $<1.0 \times 10^{-20}$ | $2.2 \times 10^{-1}$   | $<1.0 \times 10^{-20}$ |
| <i>NLRC5</i>    | GI_28951070-S | 16         | $<1.0 \times 10^{-20}$ | $3.3 \times 10^{-1}$   | $<1.0 \times 10^{-20}$ |
| <i>HRNBP3</i>   | hmm23957-S    | 17         | $<1.0 \times 10^{-20}$ | $3.5 \times 10^{-1}$   | $<1.0 \times 10^{-20}$ |
| <i>LPL</i>      | GI_4557726-S  | 8          | $4.5 \times 10^{-12}$  | $4.8 \times 10^{-4}$   | $4.1 \times 10^{-13}$  |
| <i>TCTN1</i>    | GI_31542721-S | 12         | $2.3 \times 10^{-3}$   | $3.0 \times 10^{-8}$   | $2.6 \times 10^{-9}$   |
| <i>TRAK2</i>    | GI_13027379-S | 2          | $6.3 \times 10^{-4}$   | $1.2 \times 10^{-5}$   | $6.8 \times 10^{-8}$   |
| <i>IL1R2</i>    | GI_27894333-A | 2          | $2.8 \times 10^{-1}$   | $<1.0 \times 10^{-20}$ | $1.2 \times 10^{-7}$   |
| <i>IQCG</i>     | GI_31340578-S | 3          | $5.9 \times 10^{-11}$  | $2.0 \times 10^{-1}$   | $1.2 \times 10^{-7}$   |
| <i>FLJ43505</i> | GI_42656096-S | 1          | $1.7 \times 10^{-1}$   | $4.0 \times 10^{-10}$  | $2.5 \times 10^{-7}$   |
| <i>TPPP3</i>    | GI_7706275-A  | 16         | $1.7 \times 10^{-3}$   | $1.8 \times 10^{-5}$   | $3.0 \times 10^{-7}$   |
| <i>ZNF613</i>   | GI_21362002-S | 19         | $4.8 \times 10^{-10}$  | $1.9 \times 10^{-1}$   | $3.8 \times 10^{-7}$   |
| <i>CDCA7L</i>   | GI_31542536-S | 7          | $1.2 \times 10^{-1}$   | $7.6 \times 10^{-9}$   | $6.8 \times 10^{-7}$   |
| <i>ZDHHC23</i>  | GI_27734844-S | 3          | $2.0 \times 10^{-1}$   | $2.1 \times 10^{-9}$   | $1.0 \times 10^{-6}$   |
| <i>RTN1</i>     | GI_10863934-S | 14         | $9.2 \times 10^{-3}$   | $9.8 \times 10^{-6}$   | $1.4 \times 10^{-6}$   |
| <i>SLC6A16</i>  | GI_7662517-S  | 19         | $4.6 \times 10^{-2}$   | $4.5 \times 10^{-7}$   | $1.5 \times 10^{-6}$   |
| <i>C12orf62</i> | GI_34147446-S | 12         | $1.9 \times 10^{-3}$   | $1.0 \times 10^{-4}$   | $1.5 \times 10^{-6}$   |

|                  |               |    |                      |                      |                      |
|------------------|---------------|----|----------------------|----------------------|----------------------|
| <i>ABCB4</i>     | GI_9961251-A  | 7  | $1.7 \times 10^{-1}$ | $1.0 \times 10^{-8}$ | $1.8 \times 10^{-6}$ |
| <i>MGC52498</i>  | hmm8270-S     | 1  | $4.1 \times 10^{-2}$ | $2.0 \times 10^{-6}$ | $3.5 \times 10^{-6}$ |
| <i>C12orf57</i>  | GI_34147536-S | 12 | $1.8 \times 10^{-2}$ | $2.3 \times 10^{-5}$ | $6.4 \times 10^{-6}$ |
| <i>NUP88</i>     | GI_24497452-S | 17 | $9.2 \times 10^{-2}$ | $6.4 \times 10^{-7}$ | $6.5 \times 10^{-6}$ |
| <i>IL4R</i>      | GI_4557668-S  | 16 | $2.4 \times 10^{-1}$ | $2.9 \times 10^{-8}$ | $7.1 \times 10^{-6}$ |
| <i>ABCG1</i>     | GI_8051576-A  | 21 | $2.8 \times 10^{-3}$ | $4.7 \times 10^{-4}$ | $8.6 \times 10^{-6}$ |
| <i>LYRM1</i>     | GI_19923825-S | 16 | $7.8 \times 10^{-4}$ | $1.8 \times 10^{-3}$ | $8.7 \times 10^{-6}$ |
| <i>NASP</i>      | GI_27262629-A | 1  | $2.4 \times 10^{-2}$ | $2.3 \times 10^{-5}$ | $9.4 \times 10^{-6}$ |
| <i>PKIG</i>      | GI_32483384-A | 20 | $1.5 \times 10^{-1}$ | $2.8 \times 10^{-7}$ | $1.0 \times 10^{-5}$ |
| <i>PPAPDC1B</i>  | GI_40316920-S | 8  | $1.7 \times 10^{-1}$ | $2.6 \times 10^{-7}$ | $1.2 \times 10^{-5}$ |
| <i>LOC283663</i> | GI_42660461-S | 15 | $2.9 \times 10^{-1}$ | $4.3 \times 10^{-8}$ | $1.5 \times 10^{-5}$ |
| <i>FAM129C</i>   | GI_31542206-S | 19 | $3.6 \times 10^{-2}$ | $2.2 \times 10^{-5}$ | $1.6 \times 10^{-5}$ |
| <i>LILRB2</i>    | GI_5031910-S  | 19 | $2.6 \times 10^{-1}$ | $8.7 \times 10^{-8}$ | $1.7 \times 10^{-5}$ |
| <i>MAPK7</i>     | GI_20986498-A | 17 | $2.5 \times 10^{-2}$ | $5.2 \times 10^{-5}$ | $1.8 \times 10^{-5}$ |
| <i>C6orf64</i>   | GI_8922866-S  | 6  | $4.7 \times 10^{-4}$ | $6.6 \times 10^{-3}$ | $2.1 \times 10^{-5}$ |
| <i>LOC283551</i> | GI_27479394-S | 14 | $1.7 \times 10^{-2}$ | $1.3 \times 10^{-4}$ | $2.3 \times 10^{-5}$ |
| <i>CYP51A1</i>   | GI_13929427-S | 7  | $2.1 \times 10^{-7}$ | $2.4 \times 10^{-1}$ | $2.4 \times 10^{-5}$ |
| <i>USP7</i>      | GI_4507856-S  | 16 | $4.4 \times 10^{-2}$ | $2.8 \times 10^{-5}$ | $2.5 \times 10^{-5}$ |
| <i>PRPF38A</i>   | GI_24762235-I | 1  | $1.0 \times 10^{-2}$ | $3.2 \times 10^{-4}$ | $2.6 \times 10^{-5}$ |
| <i>C22orf32</i>  | GI_34222144-S | 22 | $1.1 \times 10^{-1}$ | $4.1 \times 10^{-6}$ | $2.7 \times 10^{-5}$ |
| <i>GPBAR1</i>    | GI_24850108-S | 2  | $1.1 \times 10^{-3}$ | $4.1 \times 10^{-3}$ | $2.7 \times 10^{-5}$ |

---
